# Supplementary material
Source: publisher site journal article supplement (https://www.degruyterbrill.com/publication/isbn/9783110248531/downloadAsset/9783110248531_Inhaltsverzeichnis.pdf)
Supplement: Supplementary file 1 [file 9783110248531_Inhaltsverzeichnis.pdf]

## Inhaltsverzeichnis

| Nr. |                                                                                                                                                                                       | S. |
|-----|---------------------------------------------------------------------------------------------------------------------------------------------------------------------------------------|----|
| 1   | Recht einer Ordensschwester auf informationelle Selbstbestimmung. VG Regensburg, Urteil vom 11.1.2006 (RO 3 K 05.01073).....                                                          | 1  |
| 2   | Hausfriedensbruch und Störung der Religionsausübung. Thüringer Oberlandesgericht, Urteil vom 13.1.2006 (1 Ss 296/05) .....                                                            | 13 |
| 3   | Keine Konkurrentenklage in privatrechtlichen Anstellungsverhältnissen. LAG Köln, Beschluss vom 23.1.2006 (7 Ta 26/06).....                                                            | 19 |
| 4   | Rechtshilfe f. Religionsgemeinschaft. VG Freiburg, Beschluss vom 24.1.2006 (2 K 2061/05) .....                                                                                        | 22 |
| 5   | Zuschüsse für Schwangerenberatungsstellen. BayVerfGH, Entscheidung vom 25.1.2006 (Vf. 14-VII-02).....                                                                                 | 24 |
| 6   | Verbot eines religiösen Vereins. BVerwG, Urteil vom 25.1.2006 (6 A 6/05) .....                                                                                                        | 45 |
| 7   | Kritischer Presseartikel über kath. Glaubenslehre u. Judenverfolgung. EGMR, Urteil vom 31.1.2006 (No. 64016/00 [Giniewski ./ Frankreich]).....                                        | 52 |
| 8   | Zeugen Jehovas, Anerkennung der als Körperschaft des öffentl. Rechts. BVerwG, Beschluss vom 1.2.2006 (7 B 80/05) .....                                                                | 64 |
| 9   | Arbeitsvertrag eines Pfarrers, Kündigung. BAG, Urteil vom 2.2.2006 (2 AZR 154/05).....                                                                                                | 69 |
| 10  | Konfirmationskosten als unterhaltsrechtl. Sonderbedarf. BGH, Urteil vom 15.2.2006 (XII ZR 4/04) .....                                                                                 | 82 |
| 11  | Kein Verwaltungsrechtsweg bei Vergabe von Bauaufträgen unterhalb der Schwellenwerte durch Religionsgemeinschaft. VG Neustadt/Weinstraße, Beschluss vom 22.2.2006 (4 L 245/06.NW)..... | 88 |
| 12  | Kritische Äußerungen eines kirchl. Beauftragten über eine der Glaubensgemeinschaft „Universelles Leben“ nahestehende Fachklinik. BayVGh, Beschluss vom 24.2.2006 (7 CE 05.3199) ..... | 92 |
| 13  | Ehescheidung griechischer Staatsangehöriger muslim. Glaubens. OLG Hamm, Urteil vom 7.3.2006 (7 UF 123/05) .....                                                                       | 96 |
| 14  | Kein Rechtsweg zu den staatlichen Verwaltungsgerichten gegen innerkirchl. Organisationsmaßnahme. VG Hannover, Urteil vom 8.3.2006 (6 A 2792/05) .....                                 | 99 |

|    |                                                                                                                                                           |     |
|----|-----------------------------------------------------------------------------------------------------------------------------------------------------------|-----|
| 15 | Muslima mit Kopftuch als Schöffin in Strafsachen. LG Bielefeld, Beschluss vom 16.3.2006 (3221 b E H 68) .....                                             | 103 |
| 16 | Erzwingungshaft zu Durchsetzung der Schulpflicht. VG Hamburg, Beschluss vom 21.3.2006 (15 V 418/06) .....                                                 | 105 |
| 17 | Kirchenmitgliedschaft / Kirchensteuerpflicht bei Konversion. VG Os-nabrück, Urteil vom 21.3.2006 (1 A 491/05) .....                                       | 114 |
| 18 | Schülerbeförderungskosten einer Bekenntnisgrundschule in freier Trägerschaft. VG Leipzig, Urteil vom 22.3.2006 (4 K 545/05) .....                         | 123 |
| 19 | Morgengabe (mahr) islamischen Rechts. OLG Köln, Urteil vom 23.3.2006 (21 UF 144/05) .....                                                                 | 130 |
| 20 | Restitution von Grundstücken aus ehemaligem Klostergut. BVerwG, Urteil vom 29.3.2006 (8 C 19/04) .....                                                    | 138 |
| 21 | Sperrzeit für Arbeitslosengeldanspruch nach Kündigung wegen Kir-chenaustritts. LSG Rheinland-Pfalz, Urteil vom 30.3.2006 (L 1 AL 162/05) .....            | 145 |
| 22 | Kritische Äußerungen eines Pfarrers über Bekenntnisschule einer anderen Religionsgemeinschaft. BVerwG, Beschluss vom 4.4.2006 (7 B 94/05) .....           | 150 |
| 23 | Umgang des Kindes mit seinen den Zeugen Jehovas angehörenden Großeltern. OLG München, Beschluss vom 6.4.2006 (2 UF 1292/05) ..                            | 158 |
| 24 | Fernbleiben von der Arbeit an religiösem Feiertag EGMR, Urteil vom 13.4.2006 (No. 55170/00) .....                                                         | 161 |
| 25 | Kirchenpatronatsrecht, Eigentumsübergang aufgrund kirchlicher Widmung. Brandenburgisches OLG, Urteil vom 19.4.2006 (4 U 169/05) ..                        | 170 |
| 26 | Personalratswahl beim Evangelischen Kirchenamt der Bundeswehr. VG Köln, Beschluss vom 24.4.2006 (33 K 6363/05.PVB) .....                                  | 181 |
| 27 | Verurteilung eines Journalisten wegen kritischer Äußerungen über den Islam. EGMR, Beschluss vom 2.5.2006 (App.-No. 50692/99 [Aydın Tatlav./Türkei]) ..... | 186 |
| 28 | Inscription auf einem Grabdenkmal. VG München, Urteil vom 4.5.2006 (M 10 K 05.1870) .....                                                                 | 193 |
| 29 | Einmalige Beihilfe für Kommunionfeier. VG Aachen, Urteil vom 9.5.2006 (2 K 378/04) .....                                                                  | 202 |
| 30 | Erbbaurecht an einem Altenheim-Grundstück / Grunderwerbsteuer-freiheit. BFH, Urteil vom 17.5.2006 (II R 46/04) .....                                      | 206 |

|    |                                                                                                                                                                                          |     |
|----|------------------------------------------------------------------------------------------------------------------------------------------------------------------------------------------|-----|
| 31 | Strafrechtliche Verfolgung wegen Schulpflichtverweigerung aus religiösen Gründen. BVerfG, Beschluss vom 31.5.2006 (2 BvR 1693/04) . .                                                    | 209 |
| 32 | Gewährung staatlicher Zuschüsse an jüdische Gemeinden. Niedersächsisches OVG, Beschluss vom 6.6.2006 (11 ME 52/06) . . . . .                                                             | 216 |
| 33 | Vereinigte Hospitien Trier. OVG Rheinland-Pfalz, Urteil vom 12.6.2006 (2 A 11376/05) . . . . .                                                                                           | 222 |
| 34 | Muslima mit Kopftuch als Zuhörerin im Gerichtssaal. BVerfG, Kammerbeschluss vom 27.6.2006 (2 BvR 677/05) . . . . .                                                                       | 229 |
| 35 | Abwehranspruch gegen kirchliches Glockengeläut. VG Braunschweig, Beschluss vom 30.6.2006 (2 B 226/06). . . . .                                                                           | 233 |
| 36 | Strafrechtl. Sanktion gegen Mufti wg. Amtsanmaßung. EGMR, Urteil vom 13.7.2006 (App.-No 32186/02 [Agga ./ Griechenland -3-]) . . . . .                                                   | 237 |
| 37 | Keine Verpflichtung des Staates zum Abschluss eines Staatsvertrages mit einer Religionsgemeinschaft. VG Berlin, Gerichtsbescheid vom 9.8.2006 (VG 27 A 55.06). . . . .                   | 243 |
| 38 | Schutzzfähigkeit einer sog. Glockenzier u. ihrer Abbildungen. LG Leipzig, Urteil vom 11.8.2006 (5 O 1327/06). . . . .                                                                    | 247 |
| 39 | Zuweisung eines Schülers an eine unzuständige Schule aus wichtigem Grund (hier: katholischer Religionsunterricht). OVG Berlin-Brandenburg, Beschluss vom 11.8.2006 (8 S 50.06) . . . . . | 251 |
| 40 | Dienstbefreiung am Sabbat. OVG Nordrhein-Westfalen Urteil vom 11.8.2006 (1 A 2650/05) . . . . .                                                                                          | 257 |
| 41 | Keine Ausbildungsförderung für Aufbaustudiengang Kirchenmusik A Evangelisch. VGH Baden-Württemberg, Urteil vom 29.8.2006 (7 S 2216/05) . . . . .                                         | 272 |
| 42 | Beiträge zur freiwilligen Rentenversicherung für Kirchenbeamte. BFH, Urteil vom 5.9.2006 (VI R 38/04) . . . . .                                                                          | 281 |
| 43 | Kapelle im baurechtl. Außenbereich. OVG Rheinland-Pfalz, Urteil vom 5.9.2006 (8 A 10519/06) . . . . .                                                                                    | 284 |
| 44 | Rechtsweg f. vermögensrechtl. Ansprüche eines Mitglieds d. Priesterbruderschaft St. Pius X. LAG Baden-Württemberg, Beschluss vom 6.9.2006 (17 Ta 9/06) . . . . .                         | 289 |
| 45 | Schulbesuchspflicht. EGMR, Entscheidung vom 11.9.2006 (No. 35504/03 [F.K. u.a. ./ Deutschland]) . . . . .                                                                                | 296 |
| 46 | Werbungskosten eines pensionierten Pfarrers. FG Rheinland-Pfalz, Urteil vom 12.9.2006 (2 K 1375/05) . . . . .                                                                            | 303 |

|    |                                                                                                                                                                                     |     |
|----|-------------------------------------------------------------------------------------------------------------------------------------------------------------------------------------|-----|
| 47 | Auslegung einer arbeitsvertraglichen Verweisung auf die AVR-DW-EKD. BAG, Urteil vom 13.9.2006 (4 AZR 1/06) . . . . .                                                                | 307 |
| 48 | Frauenhaus als geschützte Einrichtung im Sinne des § 89e Abs. 1 SGB VIII. BayVGh, Urteil vom 14.9.2006 (12 BV 05.124). . . . .                                                      | 321 |
| 49 | Zusammentreffen von Versorgungsanspruch und Verwendungseinkommen im kirchl. Dienstrecht. BVerwG, Urteil vom 21.9.2006 (2 C 22/05) . . . . .                                         | 326 |
| 50 | Umsatzsteuerfreiheit für Vereinsbetreuer. FG Düsseldorf, Urteil vom 21.9.2006 (5 K 4729/02 U) . . . . .                                                                             | 333 |
| 51 | Registrierung als Religionsgemeinschaft. EGMR, Urteil vom 5.10.2006 (No. 72881/01 [Moskauer Zweig d. Heilsarmee ./, Russland]) . . . . .                                            | 346 |
| 52 | Unscheidbarkeit der Ehe nach kanonischem Recht und deutscher ordre public. BGH, Urteil vom 11.10.2006 (XII ZR 79/04) . . . . .                                                      | 369 |
| 53 | Gemeinnützige Arbeit im kirchlichen Dienstverhältnis. BAG, Urteil 11.10.2006 (4 AZR 354/05). . . . .                                                                                | 380 |
| 54 | Restaurierung von Kirchen als künstlerische Tätigkeit gem. § 18 Abs. 1 Nr. 1 EStG. FG München, Urteil vom 18.10.2006 (9 K 961/05). . . . .                                          | 388 |
| 55 | Öffentliche Aufforderung zu Straftaten (Aufruf zu einem Gebet zwecks „göttlicher Bestrafung“ eines Islamkritikers). OLG Oldenburg, Beschluss vom 23.10.2006 (1 Ws 422/06) . . . . . | 394 |
| 56 | Einreiseverbot für Oberhaupt einer Religionsgemeinschaft. BVerfG, Beschluss vom 24.10.2006 (2 BvR 1908/03) . . . . .                                                                | 398 |
| 57 | Ortszuschlagstufe im kirchl. Arbeitsverhältnis bei eingetragener Lebenspartnerschaft. BAG, Urteil von 26.10.2006 (6 AZR 307/06). . . . .                                            | 405 |
| 58 | Muslima mit Kopftuch als Schöffin in Strafsachen. LG Dortmund, Beschluss vom 7.11.2006 (14 (VIII) Gen.Str.K.). . . . .                                                              | 418 |
| 59 | Liturgisches Glockenläuten. VG Augsburg, Beschluss vom 13.11.2006 (Au 3 E 06.1264) . . . . .                                                                                        | 419 |
| 60 | Zeugnisverweigerungsrecht eines Anstaltsseelsorgers. BGH, Beschluss vom 15.11.2006 (StB 15/06, 2 StE 6/05 - 8 [3] - StB 15/06). . . . .                                             | 427 |
| 61 | Ausnahmegenehmigung für Schächten. BVerwG, Urteil vom 23.11.2006 (3 C 30/05) . . . . .                                                                                              | 432 |
| 62 | Kürzung von Wartestandsbezügen. OVG Schleswig-Holstein, Urteil vom 24.11.2006 (3 LB 15/05). . . . .                                                                                 | 437 |

|    |                                                                                                                                                                                         |     |
|----|-----------------------------------------------------------------------------------------------------------------------------------------------------------------------------------------|-----|
| 63 | Kein Anspruch eines Strafgefangenen auf Aushändigung von Räucherstäbchen. KG Berlin, Beschluss vom 27.11.2006 (5 Ws 597/06 Vollz). . . . .                                              | 442 |
| 64 | AGB-Kontrolle der AVR Caritas, rückwirkende Streichung einer Weihnachtswendung. LAG Köln, Urteil vom 27.11.2006 (14 Sa 859/06) . .                                                      | 444 |
| 65 | Aufwendungen einer Religionslehrerin für eine Studienreise nach Israel keine Werbungskosten. BFH, Urteil vom 29.11.2006 (VI R 36/02)                                                    | 450 |
| 66 | Unterlassung geschäftsschädigender Äußerungen über Beziehungen eines gewerblichen Unternehmens mit einer Religionsgemeinschaft. BayVGh, Beschluss vom 4.12.2006 (7 ZB 06.1790). . . . . | 453 |
| 67 | Sperrzeit nach Kündigung wegen Kirchenaustritts. BSG, Beschluss vom 5.12.2006 (B 11a AL 95/06 B) . . . . .                                                                              | 457 |
| 68 | Befreiung von Gerichtskosten für Moscheeverein. BGH, Beschluss vom 13.12.2006 (XII ZR 83/04) . . . . .                                                                                  | 460 |
| 69 | Zur Reichweite der sog. Tätigkeitsklausel des § 4 Abs. 1 Nr. 6 Buchst. b AHB. LG Dortmund, Urteil vom 14.12.2006 (2 O 23/06) . . . . .                                                  | 463 |
| 70 | Keine Gebührenfreiheit für Kirchliche Zusatzversorgungskasse. OVG Nordrhein-Westfalen, Urteil vom 14.12.2006 (9 A 2477/04) . . . . .                                                    | 470 |
| 71 | Kündigung gegenüber dem Mitglied einer kirchlichen Mitarbeitervertretung. ArbG Essen, Urteil vom 15.12.2006 (2 Ca 3652/05) . . . . .                                                    | 476 |
| 72 | Verbot einer Demonstration am Heiligen Abend. BVerfG, Beschluss vom 22.12.2006 (1 BvQ 41/06) . . . . .                                                                                  | 484 |
| 73 | Ausnahmegenehmigung für Schächten. VG Darmstadt, Beschluss vom 28.12.2006 (3 G 2549/06) . . . . .                                                                                       | 487 |
| 74 | Ausnahmegenehmigung für Schächten. VG Augsburg, Beschluss vom 29.12.2006 (Au 4 E 06.1486) . . . . .                                                                                     | 494 |
